# Supplementary material for: Reconstructing ocean subsurface salinity at high resolution using a machine learning approach
Source: Copernicus journal article supplement (doi:10.5194/essd-2022-236), 2022-07-19
Supplement: Supplementary file [file essd-2022-236-AC2-supplement.zip]

We'd like to thank reviewer#1 for the constructive comments and suggestions. Based on these remarks we have improved the manuscript. Please find below a point-by-point response to each referee's comments. The referee comments are in **black**, our response is in blue, text changes are in orange.

Manuscript number: essd-2022-236

Title: Reconstructing ocean subsurface salinity at high resolution using a machine learning approach

MS type: Data description paper

Author(s): Tian Tian, Lijing Cheng, Gongjie Wang, John Abraham, Shihe Ren, Jiang Zhu, Junqiang Song, and Hongze Leng

Submission date for revisions: 4th Oct 2022

#### Peer-Reviewer #1:

It is a well-written paper on reconstructing subsurface salinity profiles using satellite data and some reanalysis data with the machine learning approach. A very important new contribution to the problems is the development of a better product to examine the vertical structure of the salinity field than ARM and EN4. I have the SST background, so I only have a few minor comments (which I leave to the authors to decide on how to address).

- Define the abbreviation the first time it is used in the text; also, there is no need to define it twice. The author should check it thoroughly. For example, The SST was defined in line 108 but still used in lines 66,84.

Re: Thanks, we have checked all the items and modified them according to this suggestion.

-The authors put the DOI link in the abstract. Whether the link can point to another English version which is <http://english.casodc.com/data/metadata-special-detail?id=1546377368443076609> Then more people can use this data

Re: Thanks, we applied for a new DOI link (<http://doi.org/10.57760/sciencedb.o00122.00001>) which is an English website and more easily accessible to the data. We have updated this link in the revised manuscript.

- This study used the FFNN approach to reconstruct the salinity dataset. Why the authors use this specific method? Have they done the comparison between FFNN-VAR with other models, such as XGBoost, GANs, random fores, for reconstructing the ocean subsurface salinity dataset?

Re: Thanks for pointing this out. The methods have been assessed based on published literatures and our own experiments.

- **Published researches.** Stamell et al compared the advantages and disadvantages of three different machine learning methods in reconstructing the global ocean surface pCO<sub>2</sub> from sparse observation data, and found that that XGBoost produces the best pCO<sub>2</sub> reconstruction overall, but the NN method can be best generalized in poorly sampled regions and time periods. Wang et al. (2021) compared the performance of four machine learning algorithms XGBoost, MLR, RF and NN in estimating the subsurface temperature in the western Pacific, and proved that the neural network model outperformed the other three machine learning models. Lu et al. (2019) estimated subsurface temperature using cluster-neural network method, and showed that this method was superior to clustering linear

regression and random forest method. The above mentioned research shows that the NN method has superior generalization ability and is more robust for ocean data reconstruction.

● **Our experiments.** We have used “synthetic data” approach to test the performance of different ML. CNRM-CM6-1 high-resolution model simulation is used (historical simulation that includes all climate forcings and is part of CMIP6). Because model results are with global coverage, dynamically consistent, thus can be used as “**true**” of salinity. We resample the model data according to the location of *in situ* observation to construct the “**synthetic observations**”. The synthetic observations are prepared in two counterparts. The first is after further perturbation by observational errors/noises (denoted as “**perturbed**” data to account for the impact of observational errors). The observational errors are specified in section 2.3.3. and Fig.2. The second is no perturbation (so the only error source of reconstruction is data sampling, this data is denoted as “**non-perturbed**”). Based on these synthetic data, we test different reconstruction schemes and compare the applicability of FFNN and LightGBM (an improved method of XGBoost) to reconstruct globally ocean salinity data from sparse data. Fig. X1 and Fig.X2 show that the FFNN exhibits the lower RMSE ( $\sim 0.035$  psu) and the higher correlation coefficient (CC) ( $\sim 0.866$ ) compared with LightGBM for non-perturbed synthetic data. The perturbed data shows consistent results, although the addition of noises led to slightly higher RMSE and lower CC for both methods. In particular, perturbation of data induced a CC degradation of 3.5% and 6.4% for FFNN and LightGBM, respectively (Fig.X2d). Thus, the addition of observational noises lead to larger performance degradation for LightGBM than FFNN, suggesting that FFNN is more robust.

Finally, we also compare the performance of FFNN and LightGBM in reconstructing salinity using FFNN. The results show that the salinity field reconstructed by LightGBM had many non-continuous stripe-like structures (Fig.X3), which is apparently non-physical. This is associated with the intrinsic property of the LightGBM approach: 1) LightGBM discretize continuous variable into small bins by splitting the tree nodes; 2) Tree based models give stripe-like predictions as the model was trained using spatially sparse data.

With those tests and considerations, we found FFNN be an optimal choice to reconstruct subsurface salinity data in this study.

We have summarized the above analyses into the supplementary material and add several sentences in the main manuscript to avoid the overlength of the main manuscript. “We chose FFNN because it has been shown to be superior to the other three widely used machine learning approaches in reconstructing ocean parameters. Our own evaluation based on synthetic data and salinity observations (see supplementary material) also reveals that FFNN is a robust approach and leads to the smallest error compared with other approaches [e.g., light gradient boosting machine (LightGBM)].”

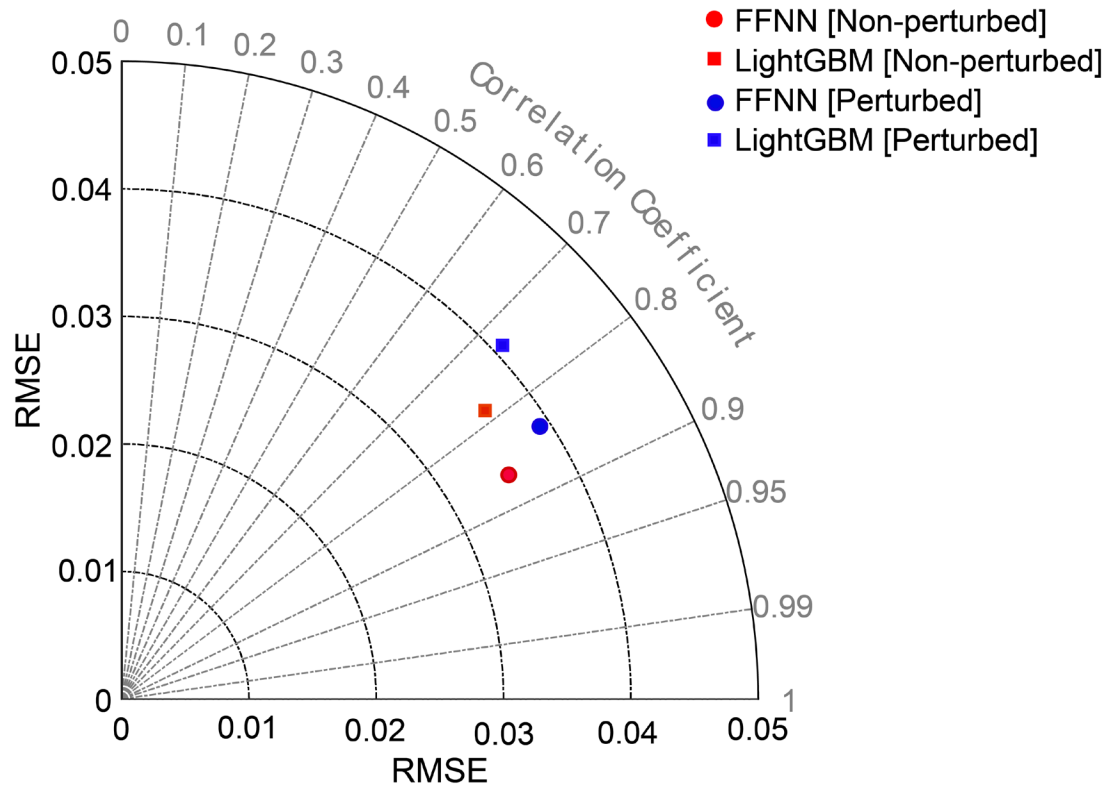

Figure X1: Distribution of 1–2000 m averaged RMSE and correlation coefficient for different ML approaches. Blue markers represent the perturbed data; Red markers represent the non-perturbed data.

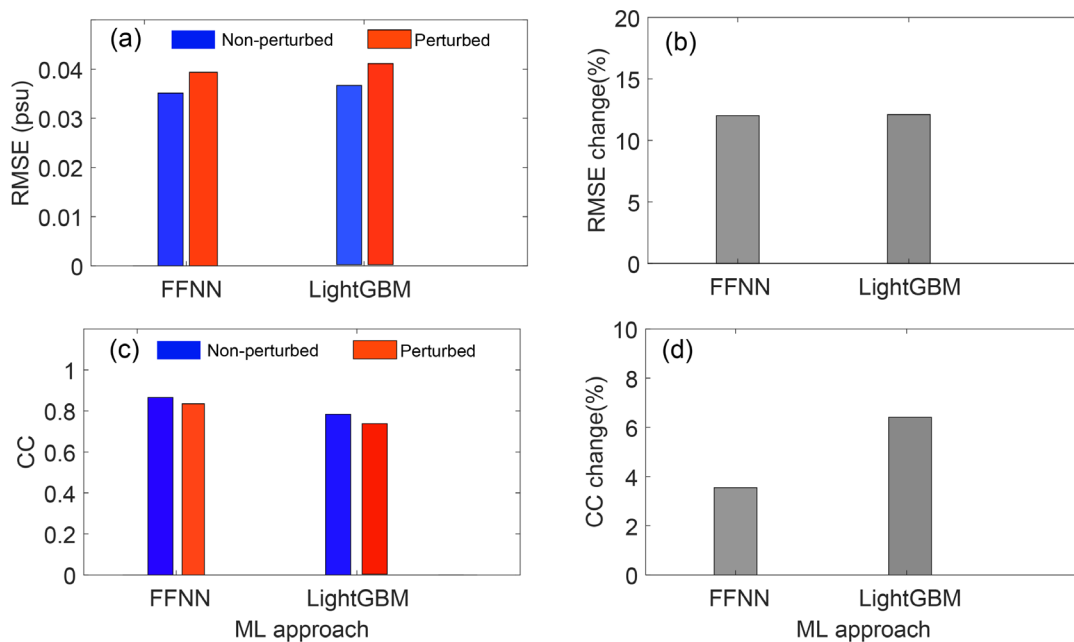

Figure X2: Statistical metrics for FFNN and LightGBM methods. (a) 1–2000 m averaged RMSE. (b) Increase of RMSE from the non-perturbed data to the perturbed data; (c) 1–2000 m averaged correlation coefficient (CC). (d) Degradation of CC from the non-perturbed data to the perturbed data.

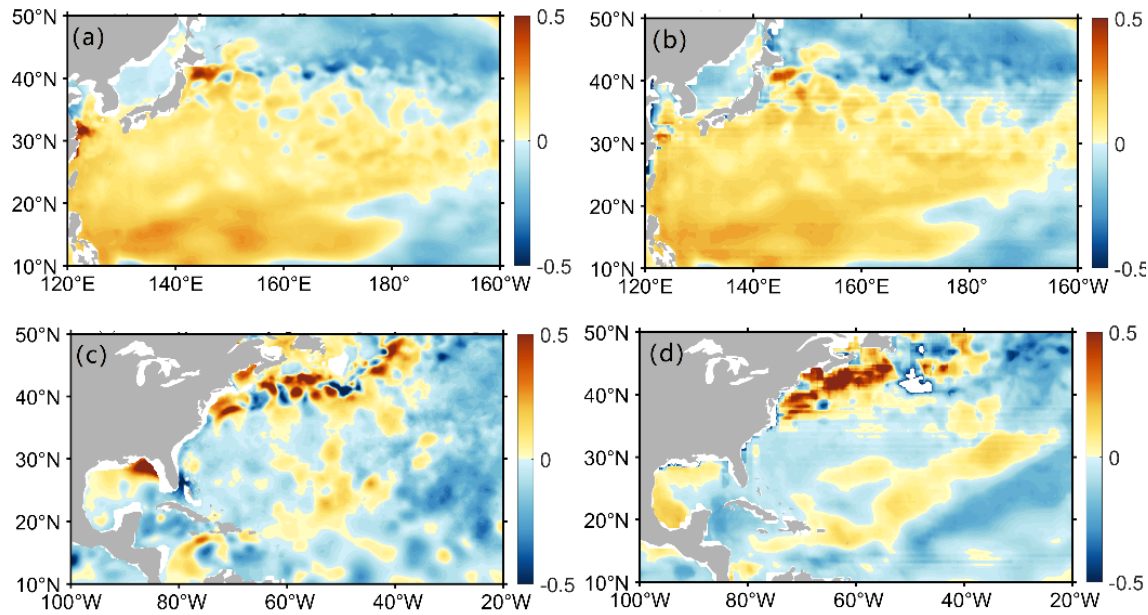

Figure X3: The geographical distribution of salinity anomalies in the Kuroshio and Gulf Stream region from data reconstructed by FFNN (left) and LightGBM (right) method in January 2016: (a–b) Northwest Pacific region; (e–f) Northwest Atlantic region.

- Figure 11 shows the seasonal fluctuation of RMSE of IAP 0.25 AND IAP 1. It's better to add the seasonal fluctuations of other in situ and reanalysis products to compare their performance.

Re: Thanks. According to your suggestion, we made some additional analysis using one representative reanalysis product: ORAS4 and one representative objective analysis product: EN4 data. We found that RMSE has strong seasonal fluctuations consistent with IAP1 and IAP0.25° (Fig.X4). We have tried to avoid including more datasets because a thorough inter-comparison of available products should be done in a separate study with carefully designed metrics. Therefore, our analyses only serve to indicate the robustness of our results.

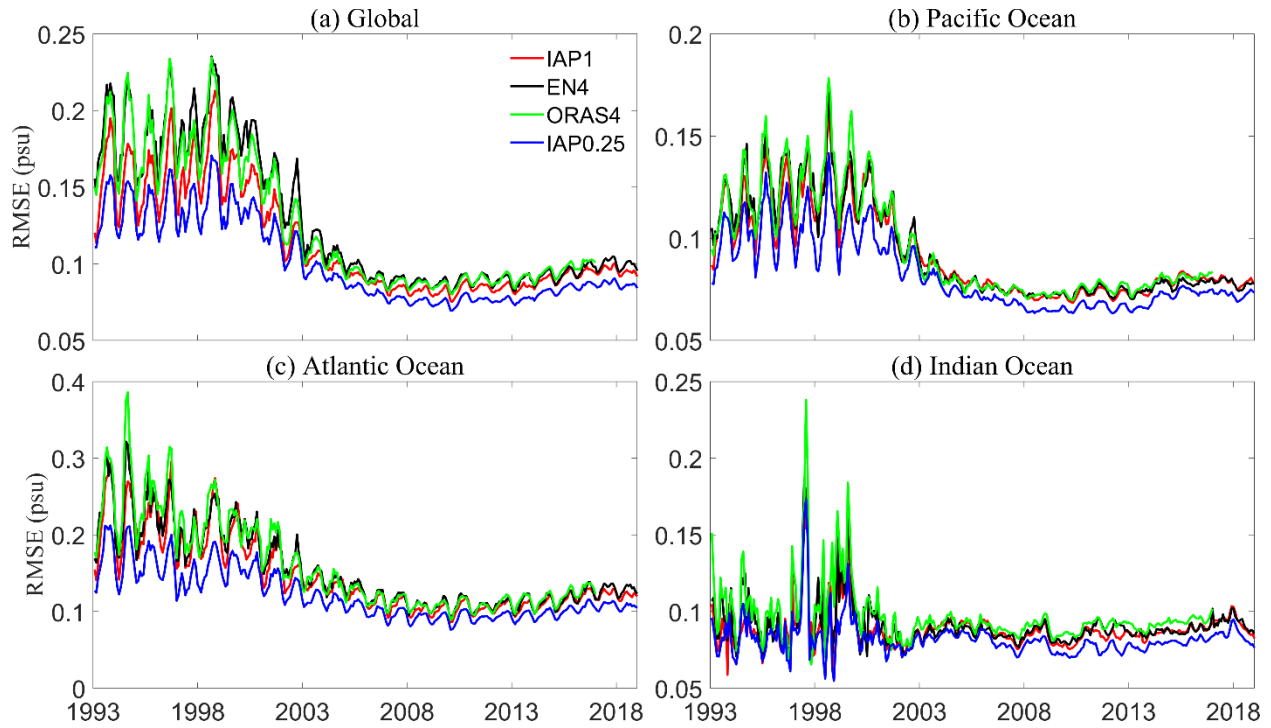

Figure X4: The 1–2000 m average RMSE time series for the IAP0.25°, IAP1°, ORAS4 and EN4 datasets for the globe and three ocean basins from 1993 to 2018.

- The authors should analysis the errors with respect to the input (SLA, SSTA, SSSA, UWSA, VWSA): Which input contributes the most errors? Which input could be the primary surface independent parameter for estimating salinity?

Re: Thanks, this is a great point and definitely help to better understand the approach. In the revised manuscript, we have used an approach named SHAP (SHAPley Additive exPlanations) to evaluate the relative contribution of different input parameters. SHAP is useful in explaining the various supervised learning models and assigns an importance value for each input variable for a specific prediction.

The analysis is supplemented in the section 2.3.4 and section 6.

### “2.3.4 Evaluating the relative importance of different inputs

In this paper, we used an approach named Kernel SHAPley Additive exPlanations (SHAP) to evaluate the contribution of different input parameters.

Shap is a method inspired by game theory to explain contribution of each feature on the model output. It works for any model and is especially useful for interpreting black box models (e.g., FFNN). It approximates the original model with a sum of linear terms. Similar to linear regression model, each term is contribution of corresponding feature on model output. To compute the linear terms, combinations of features are examined. Assuming a total of  $p$  features. For a given combination of  $k$  features out of the original  $p$ , feature  $j$  is dropped and added back to the combination. The change of model performance is marginal contribution of the feature  $j$ . Repeat the same process for all combinations of features from  $k=1$  to  $p$ . The aggregated marginal contribution over all combinations is contribution of feature  $j$  on model output.

With this approach, SHAP can quantify the average impact of an input on the final output (reconstruction in our case). The change in the output is representative of the importance of the input for predicting the output, which is called SHAP value. By comparing the SHAP value for each input, the relative contribution to the final reconstruction can be assessed.

To implement SHAP, the Kernel SHAP algorithm was employed, which makes no additional assumption about the model type (e.g., linear models, tree models and deep network models). The disadvantage of the SHAP algorithm is that it is slower than other model type specific algorithms. The SHAP algorithm is too computationally expensive to apply for the full dataset. Pauthenet et al indicated that ~0.44% of the total samples is sufficient to obtain stable results for ocean temperature and salinity reconstruction in the Gulf Stream region. Therefore, we follow their choice and randomly selected 0.5% of data to calculate the Shapley value for each input parameter (expanding it to 1% did not make significant difference based on our test). The input importance of each input is estimated by the average of absolute Shapley values for each input, which is then normalized by the sum of the absolute Shapley values to derive the relative importance of each input.

## **6 Importance of each feature for the reconstruction**

The impact of different inputs on the reconstruction of IAP0.25° using the FFNN model is shown in Fig. X5 using the SHAP method. At the surface (Fig. X5a, c), the location parameters (latitude, longitude, depth) are the most important inputs and are probably linked to the strong spatial variability of salinity near sea surface. The IAP1° plays a secondary role near the surface because it provides direct information of salinity and represents the large-scale salinity changes. Accumulatively, the remote sensing data contributes to ~20% of the reconstruction. For the subsurface (Fig. 5Xc), IAP1° plays a more important role than that near the surface (~26% for 1–2000 m average, Fig. 5Xb), and this is physically meaningful because there are fewer meso-scale variabilities in the deeper ocean and large-scale variability becomes more important at the sea subsurface. ADTA becomes more important within 100–700 m than the other layers, because both salinity and ADTA are strongly associated with thermocline variations. VSSWA, USSWA, SSTA plays a similar role from surface to 2000 m (<5% for each), and smaller than most of other inputs, probably because their changes are only weakly coupled with salinity compared with other parameters. It is interesting that time information (<3%) plays a smallest role in reconstruction, implying that the FFNN can be applied in other time periods without losing too much accuracy.

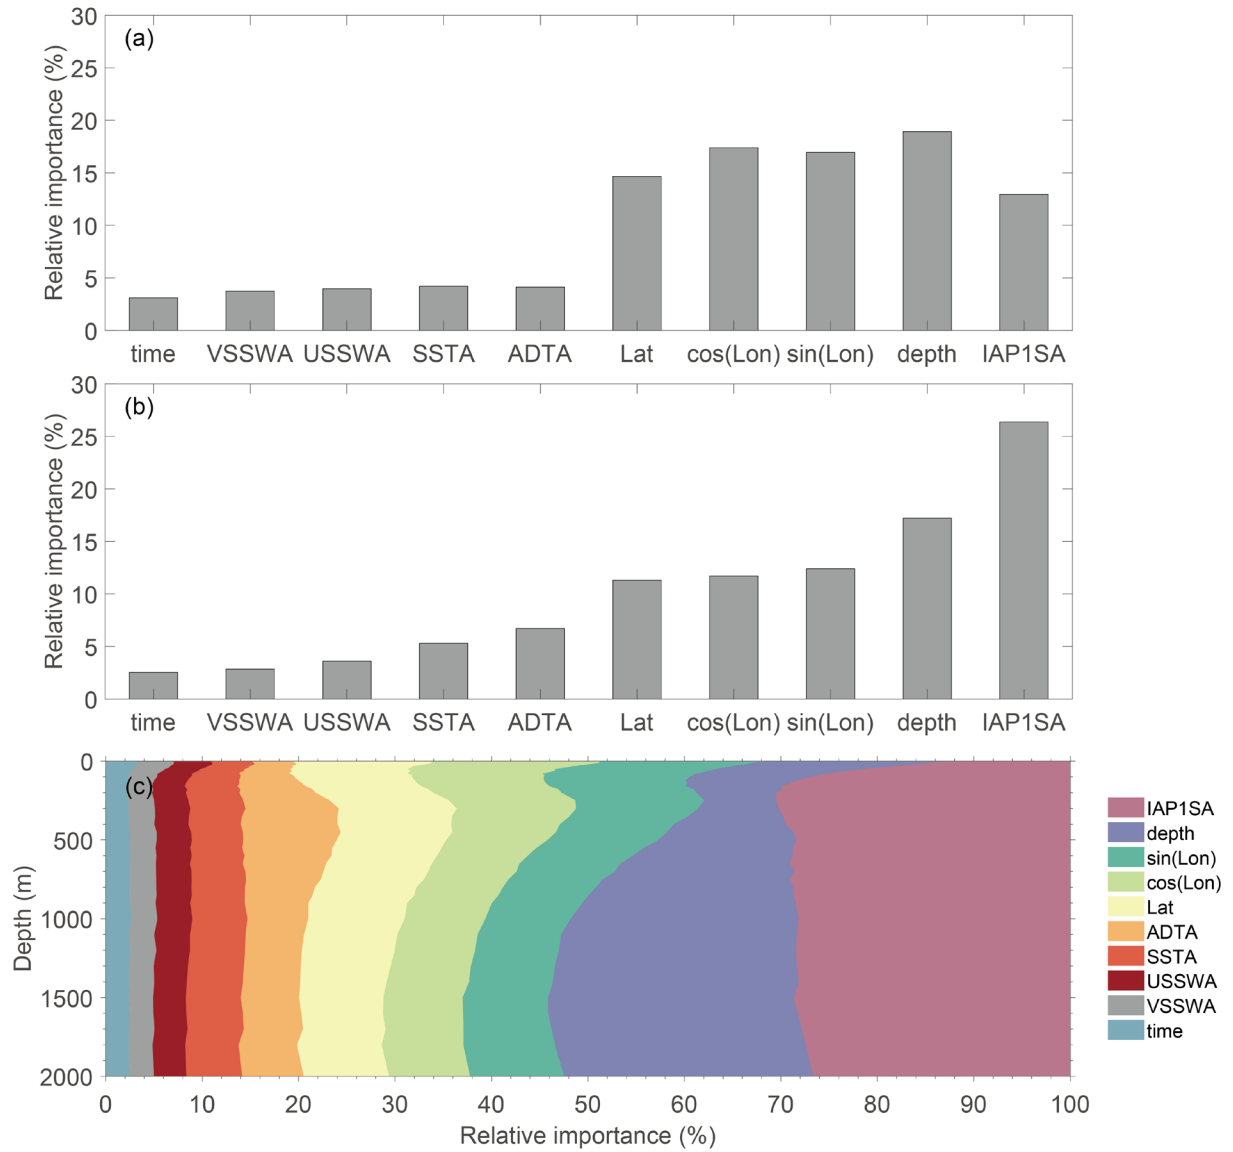

Figure X5: A quantification of the relative importance of each input in reconstruction of IAP0.25°: (a) at the surface; (b) 1–2000 m average; and (c) at each depth from 1 m to 2000 m. The input features are ranked in terms of importance, i.e., the higher is the SHAP value, the more important is the features.



We'd like to thank reviewer#2 for the constructive comments and suggestions. Based on these remarks we have improved the manuscript. Please find below a point-by-point response to each referee's comments. The referee comments are in black, our response is in blue, text changes are in orange.

Manuscript number: essd-2022-236

MS type: Data description paper

Title: Reconstructing ocean subsurface salinity at high resolution using a machine learning approach

Author(s): Tian Tian, Lijing Cheng, Gongjie Wang, John Abraham, Shihe Ren, Jiang Zhu, Junqiang Song, and Hongze Leng

Submission date for revisions: 4th Oct 2022

**Peer-Reviewer #2:**

In this work the authors describe a new product of global subsurface salinity at a high resolution ( $0.25^\circ \times 0.25^\circ$ ) covering 41 vertical levels (in the range 1-2000m), named IAP0.25°.

This product is obtained using a Feed Forward Neural Network model designed by the authors, which is trained from several input features taken from satellite sets and reanalysis to reconstruct the subsurface salinity product. Interpolated in situ observations of salinity profiles has been considered as ground truth to compare reconstruction findings. Finally, IAP0.25° is evaluated by comparison with three independent ocean products of salinity.

The overall presentation of the new product, results and evaluation metrics is of high quality, hence in my opinion the manuscript should be considered positively for publication in ESSD. I would suggest a minor revision, mainly because I find that improvements in presentation and some additional comments have to be considered. I give also line by line suggestions to ease revision.

- The paper is quite long: I find it is possible to shorten some parts by avoiding repetitive sentences or being more concise and direct in some subsections. This is particularly true, for example, for the Introduction. I believe that shortening the manuscript would aid the overall readability, hence facilitating the choice of using the authors' dataset.

Re: Thank you for your guidance and suggestions. We have revised the manuscript based on your constructive and helpful suggestions. The abstract has been cut and many repeated discussions in the manuscript have been removed.

- The link of the IAP0.25° DOI should be given for the English version of the website page. Indeed you end up in the Chinese one and when you switch to English you are brought back to the home page, which is confusing. In the website the dataset is told to cover 0-2000m instead of 1-2000m (which is correctly reported in the manuscript and seen from the netcdf downloaded)

Re: This is a good point. According to your suggestion, we applied for a new DOI link (<http://doi.org/10.57760/sciencedb.o00122.00001>) which is an English version and more easily accessible to the data. We have updated this link in the revised manuscript. We have also replaced "0-2000m" with "1-2000m" in the manuscript.



- The FFNN model description needs some additional details. In general the authors have fully described data and reconstruction and evaluation, but less attention has been paid in motivating the NN choice and structure. I believe that adding this kind of comments would aid in understanding the background ratio.

Re: Thanks for pointing this out. The methods have been assessed based on published literatures and our own experiments.

- **Published researches.** Pauthenet et al compared the advantages and disadvantages of three different machine learning methods in reconstructing the global ocean surface pCO<sub>2</sub> from sparse observation data, and found that that XGBoost produces the best pCO<sub>2</sub> reconstruction overall, but the NN method can be best generalized in poorly sampled regions and time periods. Wang et al compared the performance of four machine learning algorithms XGBoost, MLR, RF and NN in estimating the subsurface temperature in the western Pacific, and proved that the neural network model outperformed the other three machine learning models. Lu et al estimated subsurface temperature using cluster-neural network method, and showed that this method was superior to clustering linear regression and random forest method. The above mentioned research shows that the NN method has superior generalization ability and is more robust for ocean data reconstruction.

- **Our experiments.** We have used “synthetic data” approach to test the performance of different ML. CNRM-CM6-1 high-resolution model simulation is used (historical simulation that includes all climate forcings and is part of CMIP6). Because model results are with global coverage, dynamically consistent, thus can be used as “true” of salinity. We resample the model data according to the location of *in situ* observation to construct the “synthetic observations”. The synthetic observations are prepared in two counterparts. The first is after further perturbation by observational errors/noises (denoted as “perturbed” data to account for the impact of observational errors). The observational errors are specified in section 2.3.3. and Fig.2. The second is no perturbation (so the only error source of reconstruction is data sampling, this data is denoted as “non-perturbed”). Based on these synthetic data, we test different reconstruction schemes and compare the applicability of FFNN and LightGBM (an improved method of XGBoost) to reconstruct globally ocean salinity data from sparse data. Fig. X1 and Fig.X2 show that the FFNN exhibits the lower RMSE (~0.035 psu) and the higher correlation coefficient (CC) (~0.866) compared with LightGBM for non-perturbed synthetic data. The perturbed data shows consistent results, although the addition of noises led to slightly higher RMSE and lower CC for both methods. In particular, perturbation of data induced a CC degradation of 3.5% and 6.4% for FFNN and LightGBM, respectively (Fig.X2d). Thus, the addition of observational noises lead to larger performance degradation for LightGBM than FFNN, suggesting that FFNN is more robust.

Finally, we also compare the performance of FFNN and LightGBM in reconstructing salinity using FFNN. The results show that the salinity field reconstructed by LightGBM had many non-continuous stripe-like structures (Fig.X3), which is apparently non-physical. This is associated with the intrinsic property of the LightGBM approach: 1) LightGBM discretize continuous variable into small bins by splitting the tree nodes; 2) Tree based models give stripe-like predictions as the model was trained using spatially sparse data.

With those tests and considerations, we found FFNN be an optimal choice to reconstruct subsurface salinity data in this study.

We have summarized the above analyses into the supplementary material and add several sentences in the main manuscript to avoid the overlength of the main manuscript. “We choose FFNN because it has been shown to be superior to the other three widely used machine learning approaches in reconstructing

ocean parameters. Our own evaluation based on synthetic data and salinity observations (see supplementary material) also reveals that FFNN is a robust approach and leads to the smallest error compared with other approaches [e.g., light gradient boosting machine (LightGBM)].”

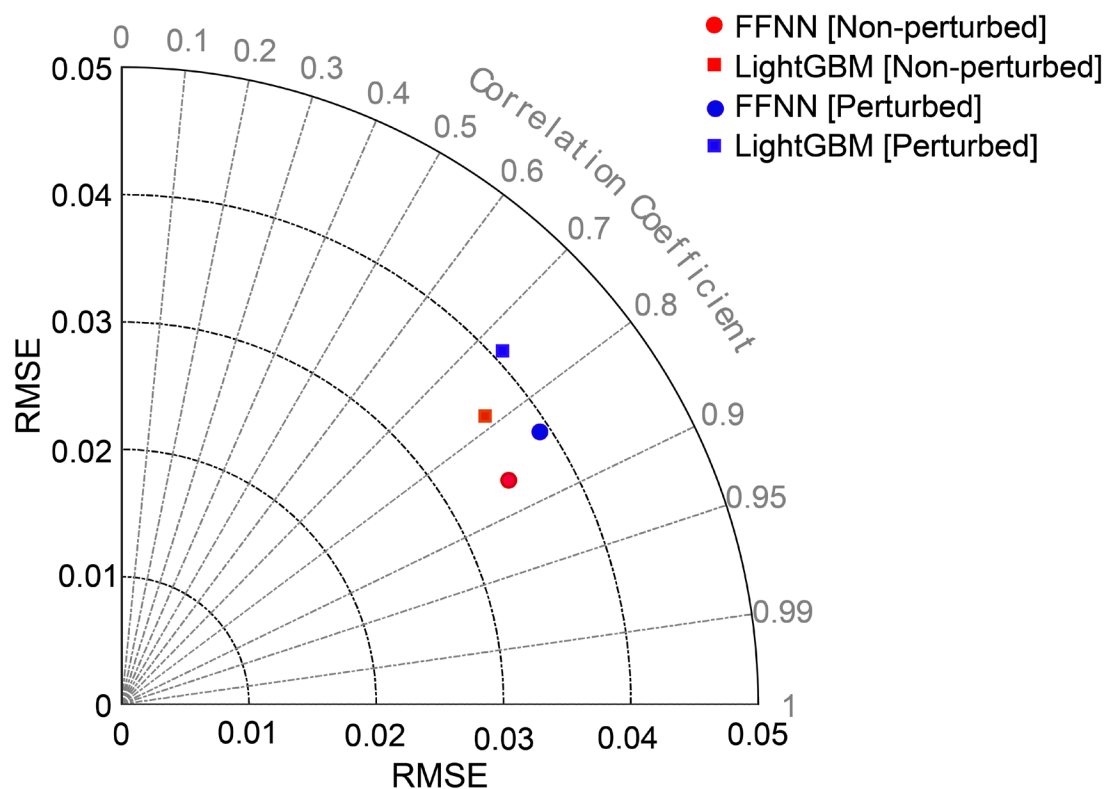

Figure X1: Distribution of 1–2000 m averaged RMSE and correlation coefficient for different ML approaches. Blue markers represent the perturbed data; Red markers represent the non-perturbed data.

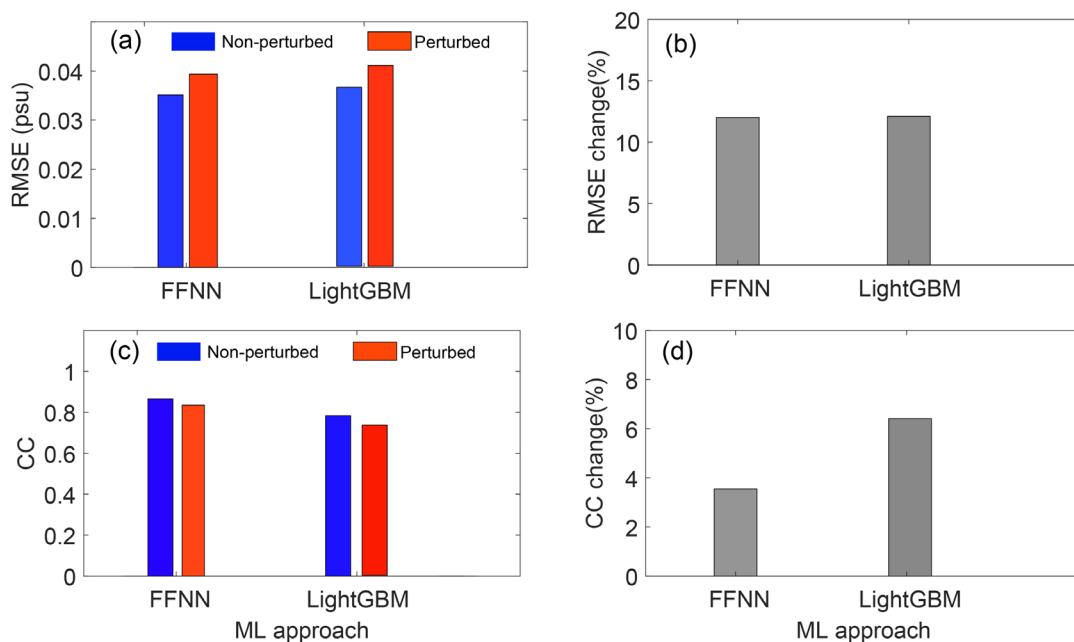

Figure X2: Statistical metrics for FFNN and LightGBM methods. (a) 1–2000 m averaged RMSE. (b) Increase of RMSE from the non-perturbed data to the perturbed data; (c) 1–2000 m averaged correlation coefficient (CC). (d) Degradation of CC from the non-perturbed data to the perturbed data.

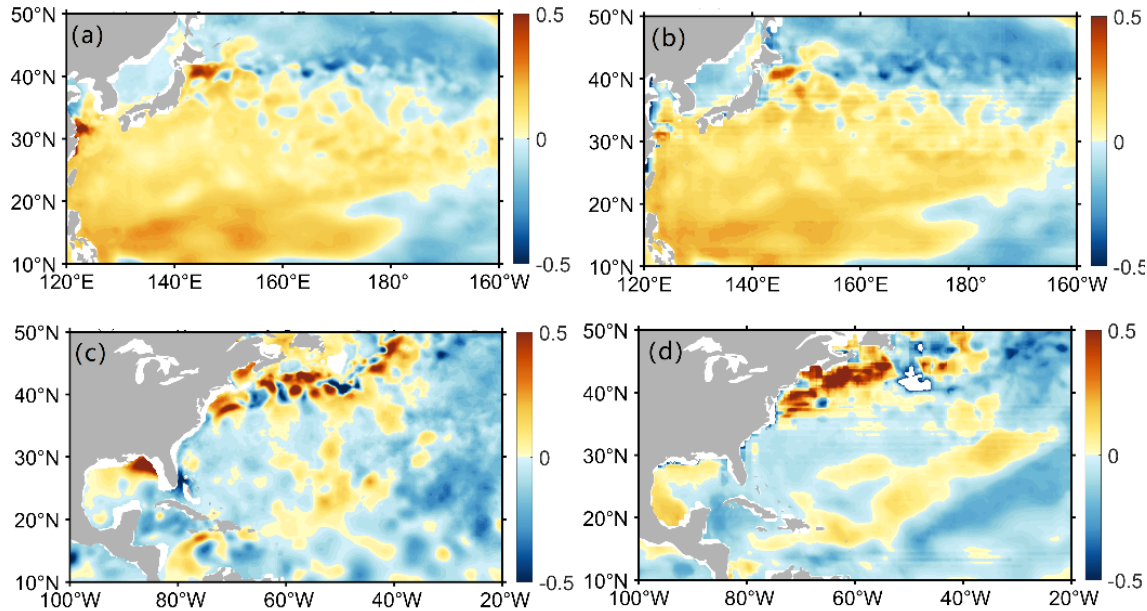

Figure X3: The geographical distribution of salinity anomalies in the Kuroshio and Gulf Stream region from data reconstructed by FFNN (left) and LightGBM (right) method in January 2016: (a–b) Northwest Pacific region; (e–f) Northwest Atlantic region.

- Understanding which input mostly influences the salinity reconstruction and causes greater propagation error would be very interesting in this work, and in my opinion would enhance completeness of the presentation (this is stated as a future step in the Summary section, hence to be considered only as a suggestion).

Re: Thanks, this is a great point and definitely help to better understand the approach. In the revised manuscript, we have used an approach named SHAP (SHAPley Additive exPlanations) to evaluate the relative contribution of different input parameters. SHAP is useful in explaining the various supervised learning models and assigns an importance value for each input variable for a specific prediction.

The analysis is supplemented in the section 2.3.4 and section 6.

### “2.3.4 Evaluating the relative importance of different inputs

In this paper, we used an approach named Kernel SHAPley Additive exPlanations (SHAP) to evaluate the contribution of different input parameters.

Shap is a method inspired by game theory to explain contribution of each feature on the model output. It works for any model and is especially useful for interpreting black box models (e.g., FFNN). It approximates the original model with a sum of linear terms. Similar to linear regression model, each term is contribution of corresponding feature on model output. To compute the linear terms, combinations of features are examined. Assuming a total of  $p$  features. For a given combination on  $k$  features out of the original  $p$ , feature  $j$  is dropped and added back to the combination. The change on model performance is

marginal contribution of the feature  $j$ . Repeat the same process for all combinations of features from  $k=1$  to  $p$ . The aggregated marginal contribution over all combinations is contribution of feature  $j$  on model output.

With this approach, SHAP can quantify the average impact of an input on the final output (reconstruction in our case). The change in the output is representative of the importance of the input for predicting the output, which is called SHAP value. By comparing the SHAP value for each input, the relative contribution to the final reconstruction can be assessed.

To implement SHAP, the Kernel SHAP algorithm was employed, which makes no additional assumption about the model type (e.g., linear models, tree models and deep network models). The disadvantage of the SHAP algorithm is that it is slower than other model type specific algorithms. The SHAP algorithm is too computationally expensive to apply for the full dataset. Pauthenet et al indicated that  $\sim 0.44\%$  of the total samples is sufficient to obtain stable results for ocean temperature and salinity reconstruction in the Gulf Stream region. Therefore, we follow their choice and randomly selected 0.5% of data to calculate the Shapley value for each input parameter (expanding it to 1% did not make significant difference based on our test). The input importance of each input is estimated by the average of absolute Shapley values for each input, which is then normalized by the sum of the absolute Shapley values to derive the relative importance of each input.

## 6 Importance of each feature for the reconstruction

The impact of different inputs on the reconstruction of IAP0.25° using the FFNN model is shown in Fig. X4 using the SHAP method. At the surface (Fig. X4a and Fig. X4c), the location parameters (latitude, longitude, depth) are the most important inputs and are probably linked to the strong spatial variability of salinity near sea surface. The IAP1° plays a secondary role near the surface because it provides a direct information of salinity and represents the large-scale salinity changes. Accumulatively, the remote sensing data contributes to  $\sim 20\%$  of the reconstruction. For the subsurface (Fig. X4c), IAP1° plays a more important role than that near the surface ( $\sim 26\%$  for 1–2000 m average, Fig. 5Xb), and this is physically meaningful because there are fewer meso-scale variabilities in the deeper ocean and large-scale variability becomes more important at the sea subsurface. ADTA becomes more important within 100–700 m than the other layers, because both salinity and ADTA are strongly associated with thermocline variations. VSSWA, USSWA, SSTA plays a similar role from surface to 2000 m ( $< 5\%$  for each), and smaller than most of other inputs, probably because their changes are only weakly coupled with salinity compared with other parameters. It is interesting that time information ( $< 3\%$ ) plays a smallest role in reconstruction, implying that the FFNN can be applied in other time periods without losing too much accuracy.

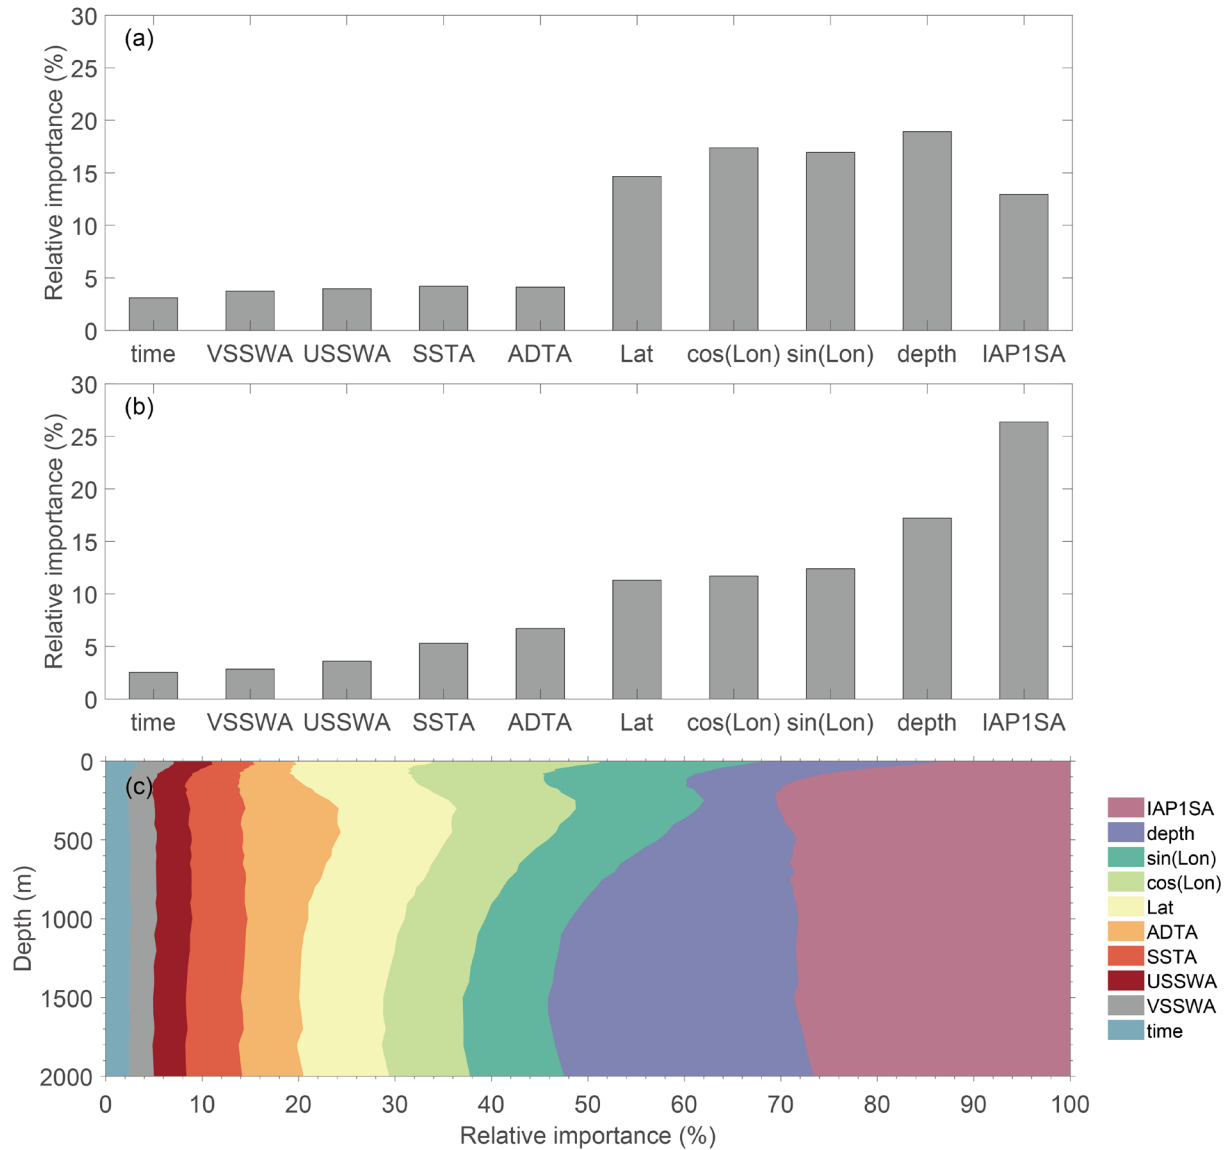

Figure X4: A quantification of the relative importance of each input in reconstruction of IAP0.25°: (a) at the surface; (b) 1–2000 m average; and (c) at each depth from 1 m to 2000 m. The input features are ranked in terms of importance, i.e., the higher is the SHAP value, the more important is the features.

- In several points some statements sound very vague or too general (see line by line comments hereafter). I suggest to be more precise. For example, the authors could revise how they refer to machine learning in a vague way: it might be more interesting to focus on neural networks only, since this is the model choice for this study.

Re: We appreciate for your detailed suggestions, we have revised the manuscript based on your suggestions, as introduced below.

## 1. Introduction

- (54) typo \*below the ocean surface

Re: Corrected.

- (62) what to you mean with sufficient data quality? This is vague

Re: Great suggestion, sentence revised to “high-quality observational datasets with resolutions higher than  $1^\circ \times 1^\circ$  ~~a dataset with a resolution higher than  $1^\circ \times 1^\circ$  and with sufficient data quality~~ could be useful for ocean and climate research”

- (75-76) state better the limitations

Re: Great suggestion, Sentence revised to “~~However, both dynamical and statistical approaches are overly dependent on physical assumptions, are always simplified, and have important limitations. For example, the surface dynamic height is apparently nonlinearly correlated with subsurface temperature/salinity.~~ both dynamic and statistical approaches have obvious limitations. The dynamic approach is overly dependent on physical assumptions, which are always simplified such as relying on Surface Quasi-Geostrophic dynamics to derive subsurface signals from surface changes. Caveats of the statistical approach is the lack of physical constraints and the simplified assumptions. For example, some approaches have simplified the nonlinear relationship between surface dynamic height and subsurface temperature/salinity to a linear relationship.”

- (77-78) in this study you inspect NN for reconstruction of salinity field only, not for other ocean subsurface fields. state better

Re: Thanks a lot. Following your next suggestion, we have removed this sentence. “~~This study takes advantage of machine learning to develop an alternative approach to reconstructing high resolution ( $0.25^\circ \times 0.25^\circ$ ) ocean subsurface fields (i.e., salinity)~~”

- (94-96) a bit repetitive with (77-79). revise by shortening

Re: Thanks, we removed the sentence “~~This study takes advantage of machine learning to develop an alternative approach to reconstructing high resolution ( $0.25^\circ \times 0.25^\circ$ ) ocean subsurface fields (i.e., salinity)~~”

- (86) I would not talk about "major deficiencies", which sounds too strong for the subsequent comments. Maybe \*some differences, \*some limitations or similar

Re: Great suggestion, Sentence revised to “Although these studies provide some hints that machine learning approaches can be useful in data reconstruction applications, ~~there are major deficiencies~~ there are still some limitations.”

- (97) the second objective introduced does not sound as an objective

Re: This sentence revised to “Second, the new machine-learning-based high-resolution ( $0.25^\circ \times 0.25^\circ$ ) salinity dataset will be comprehensively evaluated in this study, which facilitate its further applications”

- (103) currently your section 6 is of Data availability (this could become your last section 7, probably more appropriate)

Re: Sentence modified to “Importance of each feature for the reconstruction is described in section 6. Data availability is described in Section 7. The results of the study are summarized and discussed in section 8.”

## 2. Data & Methods

- (107-109) this should be said in the introduction, not here. I would not say "a machine learning model", which sounds very general; instead point out it is your model- this happens also in other points of the paper.  
Re: Thanks. We put this part of the statement in the penultimate paragraph of the introduction. "This paper explores the feed-forward neural network (FFNN) approach to reconstruct a high-resolution (processed to a gridded  $0.25^\circ \times 0.25^\circ$  arithmetic mean field in this study, detailed in the following text) ocean subsurface (1–2000 m) salinity dataset for the period 1993–2018 by merging *in situ* profile observations with high-resolution ( $0.25^\circ \times 0.25^\circ$ ) satellite remote sensing altimetry absolute dynamic topography (ADT), SST, sea surface wind (SSW) data, which included zonal (USSW) and meridional (VSSW) components, and a coarse resolution IAP1° gridded salinity product."

"a machine learning model" is changed to "FFNN".

- (110, 115, 121) sentences "data were from.." could be improved with expressions as: we use, we downloaded, data was extracted from...

Re: Great suggestion. We change "data were from" to "data was extracted from".

- (112) sounds like you have done the optimal interpolation

Re: We have removed this sentence "An optimal interpolation was made when merging all the satellite data in order to compute gridded ADT information".

- (116) take off "and extrapolating"

Re: Done

- (119-120) take off last sentence, you say this at the end of the 2.1.1 ssec, repetitive

Re: Done

- Table 1. Should be better organised, I suggest you should have: Data type, Variable, Dataset, Data Source, Horizontal resolution, Vertical coverage and resolution, Time period, Reference, DOI; hence correct information given (e.g., for SST you would have Variable: SST, Dataset: OISST, Data Source: NOAA, etc.). Pay attention to classifying Salinity observations as Input, since indeed you use it as ground truth to which you compare the model output.

Re: Great suggestion, we have revised the Table 1 following your suggestion. Note that for some data (such as IAP1° ), there is no DOI, just a website and a paper.

| Data type | Variable | Dataset | Data source | Horizontal resolution          | Vertical coverage and resolution | Time period | Reference             | DOI/URL                                                                                                                                 |
|-----------|----------|---------|-------------|--------------------------------|----------------------------------|-------------|-----------------------|-----------------------------------------------------------------------------------------------------------------------------------------|
| Input     | ADT      | CMEMS   | CMEMS       | $0.25^\circ \times 0.25^\circ$ | Sea surface                      | 1993–2020   | (Mertz et al., 2016)  | <a href="https://doi.org/10.48670/moi-00148">https://doi.org/10.48670/moi-00148</a>                                                     |
| Input     | SST      | OISST   | NOAA        | $0.25^\circ \times 0.25^\circ$ | Sea surface                      | 1981–2022   | (Huang et al., 2021)  | <a href="https://www.ncei.noaa.gov/products/optimum-interpolation-sst">https://www.ncei.noaa.gov/products/optimum-interpolation-sst</a> |
| Input     | SSW      | CCMP    | NCAR        | $0.25^\circ \times 0.25^\circ$ | Sea surface                      | 1987–2019   | (Wentz et al., 2016)  | <a href="https://doi.org/10.5065/4TSY-K140/">https://doi.org/10.5065/4TSY-K140/</a>                                                     |
| Input     | Salinity | IAP1°   | IAP         | $1^\circ \times 1^\circ$       | 41 levels (1–2000 m)             | 1960–2021   | (Cheng and Zhu, 2016) | <a href="http://www.ocean.iap.ac.cn/">http://www.ocean.iap.ac.cn/</a>                                                                   |



|            |                       |                      |           |                                              |                                      |           |                                  |                                                                                                                               |
|------------|-----------------------|----------------------|-----------|----------------------------------------------|--------------------------------------|-----------|----------------------------------|-------------------------------------------------------------------------------------------------------------------------------|
| Input      | Salinity observations | In situ observations | WOD       | Averaged into $0.25^\circ \times 0.25^\circ$ | Interpolated to 41 levels (1–2000 m) | 1960–2021 | (Boyer et al., 2018)             | <a href="https://www.ncei.noaa.gov/products/world-ocean-database">https://www.ncei.noaa.gov/products/world-ocean-database</a> |
| Validation | Salinity              | ARMOR3D              | CMEMS     | $0.25^\circ \times 0.25^\circ$               | 50 levels (1–5000 m)                 | 1993–2020 | (Mertz et al., 2016)             | <a href="https://doi.org/10.48670/moi-00052">https://doi.org/10.48670/moi-00052</a>                                           |
| Validation | SSS                   | SMAP                 | NOAA      | $0.25^\circ \times 0.25^\circ$               | Sea surface                          | 2015–2019 | (Vinogradova et al., 2019)       | <a href="https://data.remss.com/smap/SSS/V04.0/">https://data.remss.com/smap/SSS/V04.0/</a>                                   |
| Validation | Salinity              | EN4                  | UK Office | Met $1^\circ \times 1^\circ$                 | 42 levels (1–5500 m)                 | 1940–2018 | (Gouretski and Reseghetti, 2010) | <a href="https://www.metoffice.gov.uk/hadobs/en4/">https://www.metoffice.gov.uk/hadobs/en4/</a>                               |

- Eventually insert DOIs in text for each product for completeness

Re: Thanks a lot. I texted the DOI or url (if DOI is not available) of the data source in table 1 to avoid the overlength of the manuscript.

- (131) say something more of interpolation technique adopted

Re: Great suggestion, Sentence revised to “All of the above-mentioned products were processed into monthly averages, and IAP1° data were linearly interpolated to unified  $0.25^\circ \times 0.25^\circ$  resolution fields ~~interpolated into unified monthly and  $0.25^\circ \times 0.25^\circ$  spatial resolution fields~~, which were used as inputs for our machine learning the FFNN approach.”

- (139-140) state better, e.g., anomaly profiles are derived by subtracting monthly climatologies from salinity profiles.

Re: Great suggestion. Sentence revised to “and anomaly profiles are derived by subtracting monthly climatologies from salinity profiles ~~all salinity profiles are subtracting the monthly climatology to derive the anomaly profiles.~~”

- (140-141) not clear to me, to state better

Re: The sentence has been changed to “Finally, the salinity anomalies were averaged into  $0.25^\circ \times 0.25^\circ$ , 1-month, and 41-level grid boxes via simple arithmetic averaging, without spatial interpolation and smoothing. The reconstructions are applied to the anomaly fields, similar to previous objective analyses, because of the larger spatial decorrelation length scale of the anomaly fields than the absolute fields (i.e., Levitus et al. 2009; Cheng et al. 2017). The gridded averages used in this study are also consistent with most previous studies to reduce the sub-grid variability and observational noises.”.

- why do you say that SSA were averaged in 0.25 resolution? Did you mean interpolated?

Re: This is just averaging all anomalies into  $0.25^\circ \times 0.25^\circ$ , 1-month, and 41-level grid boxes. No interpolation is applied, so there are many grids without data (gaps).

- (146) "certain tests" is too vague. Say if you tested your method on raw profiles and found no differences, or say something more about the tests (without needing to show figures or results about)

Re: To avoid confusion, we have removed this sentence.

- (150) remove "including", since you are stating all sets

Re: Done

- (156-157) remove "which have spatial resolution of 0.25", repetitive

[Re: Done](#)

- (169) You should start this subsec by describing the FFNN, not the data. These first sentences could be moved in data subsec or later on.

[Re:](#) We moved the first sentence before "The structure of the FFNN used in this study is illustrated in Fig. 1" because the derivation of anomaly fields have already introduced in the Method section.

- (186-187) complexity of a NN depends not only on how many neurons or layers are chosen, but also on type of layers and activation functions.

[Re:](#) Great suggestion, Sentence revised to "The complexity of the FFNN depends not only on how many neurons or layers are chosen, but also on type of layers and activation functions. ~~The complexity of the network depends on the number of neurons in each layer and the number of hidden layers. The more layers, the more complex the FFNN.~~"

- (190-192) make it shorter and less repetitive

[Re:](#) Great suggestion, Sentence revised to "The input x includes longitude, latitude, depth, time, IAP1SA, ADTA, SSTA, USSWA, VSSWA."

- (195) you should not refer to your model generically as "a FFNN" but "the FFNN"

[Re: Done](#)

- (196) take off "based on training set" uninformative

[Re: Done](#)

-- (199) I would not talk about "reconstruction effect"

[Re:](#) Sentence revised to "A grid search strategy (Liashchynskyi et al. 2019) was used to optimize the structure of the neural network. The optimized neural network we used consists and we found that the overall reconstruction effect was best when the neural network structure was composed of one input layer, one output layer, and four hidden layers; the number of neurons in each hidden layer was set to 256, 128, 64, and 32; the activation function was the Rectified Linear Unit; the optimizer was the root mean square propagation (RMSProp); the learning rate was 0.001;"

-- Figure 1. when showing the output information you give several maps of subsurface salinity anomalies, since your method is reconstructing each time step separately from the others I suggest you leave only one map also in the figure. Caption: I suggest you change in "Schematics of the FFNN architecture for subsurface salinity anomalies reconstruction (IAP0.25)"

[Re:](#) Great suggestion. We have revised the figure as suggested.

- which is your cost function minimized for training? did you use a GD algorithm? say more

[Re:](#) The cost function minimized for training as follows:

$$J(\theta_0, \theta_1, \dots, \theta_n) = \frac{1}{2m} \sum_{i=1}^m (h_{\theta}(\mathbf{X}^{(i)}) - y^{(i)})^2$$

Where  $\mathbf{X}$  = (longitude, latitude, depth, time, IAP1SA, ADTA, SSTA, USSWA, VSSWA),  $y$  is the “truth values”,  $m$  is the number of samples,  $c$  is the FFNN model for training,  $\theta$  is the parameter of the model, and the training objective is the minimum  $J$ .

We used the Root mean square propagation (RMSProp) optimizer, which was widely used for the stochastic problem. RMSProp is the optimization machine learning algorithm to train the Neural Network by different adaptive learning rate and derived from the concepts of gradients descent and RProp. Combining averaging over mini-batches, efficiency, and the gradients over successive mini-batches, RMSProp can reach the faster convergence rate than SGD, Momentum, and NAG.

Sentence revised to “the activation function was the Rectified Linear Unit; the optimizer was the root mean square propagation (RMSProp); the learning rate was 0.001; the cost function minimized for training as follows:

$$J(\theta_0, \theta_1, \dots, \theta_n) = \frac{1}{2m} \sum_{i=1}^m (h_{\theta}(\mathbf{X}^{(i)}) - y^{(i)})^2$$

where  $\mathbf{X}$  = (longitude, latitude, depth, time, IAP1SA, ADTA, SSTA, USSWA, VSSWA),  $y$  is the “truth values”,  $m$  is the number of samples,  $h_{\theta}$  is the FFNN model for training,  $\theta$  is the parameter of the model, and the training objective is the minimum  $J$ .”

- (209) I would mention that the independent dataset are those introduced in ssec 2.2

Re: Thanks, but this dataset is different from section 2.2. In section 2.2, we introduced some gridded datasets constructed by independent international groups. Here the “independent data” means we have withheld 20% of data that is not used in training, so these data can be used as independent data to test the approach.

Sentence revised to “To evaluate the reconstruction using independent test data, a 5-fold cross validation approach was used.”

- (243-244) is variance the standard deviation? usually variance=std\*\*2

Re: Thanks for spotting this, we agree that using “Variance” might be misleading. We have changed “Variance” to “Var” to represent the “variability”, because it is a measure of subgrid variability (<0.25° and <1-month).

- (256) I would add "estimate machine learning methods uncertainty"

Re: Great suggestion. Sentence revised to “This is one of the most popular ways to estimate machine learning method uncertainty”.

-- (263) missing ending dot

Re: Modified

--Figure 2. (b&d) it seems to me that there might have been higher values than 0.2, flattened to be exactly 0.2. if this is the case please adapt colorbar with pointed end for out-of-range values. Eventually it would be interesting to have the four panels shown with same colorbar limits to be able to compare effectively two different depths' results (if graphically informative)

Re: We have modified the colorbar to the ones with pointed end, to better illustrate the higher values. And also, we used the same colorbar limits for all panels for a better intercomparison.

### 3. reconstruction Results

-- (275) typo: take of "as"

[Re: Corrected.](#)

- (276) you should quantify the consistency between your reconstruction and IAP1 & ARMOR3D with some metric

[Re: Thanks.](#) The quantification of the consistency between IAP0.25, IAP1 and ARMOR3D is mainly done in Section 3.3. Sections 3.1 and 3.2 are only intended to evaluate the overall performance of IAP0.25 on spatial and vertical structures with a few illustrative examples.

- (280) take off "indicating greater resolution", uninformative. Next sentence take off "of change", the patterns you are showing are of one particular month.

[Re: Done](#)

- (282) How did you perform subtraction of IAP0.25 and IAP1? Did you first have IAP1 interpolated?

[Re: Yes,](#) IAP1° data were linearly interpolated to  $0.25^\circ \times 0.25^\circ$  resolution fields, and the impact of interpolation method is negligible (it makes sense because there is no change within  $1^\circ \times 1^\circ$  grid for IAP1°).

- I find it curious that you first show results of 5m and 100m depth globally, but then you turn to 100m & 300m for specific regions. Why is this? if there is no reason I would try to be consistent between global and detail analysis

[Re: Great suggestion.](#) We did show this just arbitrarily, it does not change the key message for different choices. But for consistency, we have replaced the global results with 100 and 300 m in the revised manuscript.

- Figure 3 & 4. Refer in caption to each product by giving subfigures letters. You don't mention comparison between IAP025 and IAP1 in the caption (panel e that could be given close to the two products images)

[Re: Thanks.](#) We have revised the figure accordingly. Caption revised to "Spatial distribution of salinity anomalies ~~from~~ of (a) IAP0.25°, (b) IAP1°, (c) ARMOR3D, ~~and~~ (d) in situ observations, and (e) IAP1° minus IAP0.25° at 100 m, as well as the spatial distribution of (f) ADTA and (g) SSTA in January 2016"

- (298) You talk about reliability of the reconstruction by giving very qualitative comments, this should be quantified for robustness via some metric

[Re: Thanks.](#) The quantification of robustness is mainly done in Section 4. Here we only discuss the robustness of the reconstruction method qualitatively for some examples, we believe it helps the audience to gain a better illustrative impression before any statistical results are shown.

- (327) typo: Figure 2b and \*d

[Re: Thanks for spotting this.](#) After checking, it should be Figure 7b and d, which have been corrected.

- (334) It is not clear to me when you state that ADT change should correspond better with subsurface salinity. I would suggest to state the whole ADT paragraph better

[Re: Thanks,](#) we should be clarified that ADT change should correspond better with thermocline change (first baroclinic mode), thus the salinity change near the thermocline should resemble the ADT in many

places. These sentences have been modified to “To the first order, in the thermocline regions, the ADT change should correspond better with thermocline change (first baroclinic mode), thus the salinity change near the thermocline should resemble the ADT in many places. This is supported by Fig. 7 (red line in Fig. 7a vs. 7d); for example, the large positive anomaly near 48°W, 60°W, and 68°W revealed by both the *in situ* salinity profile and ADT data. This indicates a positive contribution of ADT to the reconstruction.”

- (345) take off "certain", it sounds vague

Re: Done

- Figure 7a. Legend should be put all together possibly internal to the image. I suggest to put longitude coordinates on the top of the figure to aid readability of comments.

Re: Great suggestion, we have revised the figure as suggested.

- (359) "seems that" does not sound as a statement. Substitute "in the global area" with "At a global scale"

Re: Great suggestion, Sentence revised to “First, ~~it seems that~~ IAP0.25\_RMSE is smaller than all other data products for both a global- and basinal averages. At a global scale ~~in the global area~~, the maximum values are 0.37 psu for IAP0.25\_RMSE, 0.50 psu for IAP1\_RMSE, 0.55 psu for ARM\_RMSE, and 0.56 psu for EN4\_RMSE near the sea surface.”

- (363-365) very heavy to read, try to improve

Re: Great suggestion, Sentence revised to “~~The global 0–2000 m averaged global reduction in RMSE for IAP0.25\_RMSE is 0.0164 psu, 0.0194 psu, and 0.0208 psu compared to IAP1\_RMSE, ARM\_RMSE, and EN4\_RMSE, respectively~~ Globally, the 1–2000 m mean IAP0.25\_RMSE is 0.016 psu, 0.019 psu and 0.021 psu lower than IAP1\_RMSE, ARM\_RMSE and EN4\_RMSE, respectively (Table 2).”

- Figure 9. The best way for comparing graphically rmse over these regions is to have same figure limits for the upper panels (same for the lower panels).

Re: Thanks a lot. I tried to set the x-axis of the subgraph to the same limit, which might cause the curves in the graph clustering together and less visible (Fig.X5 b.d.f.h). So, in order to better illustrate the difference between the curves, we decided to keep the original figure.

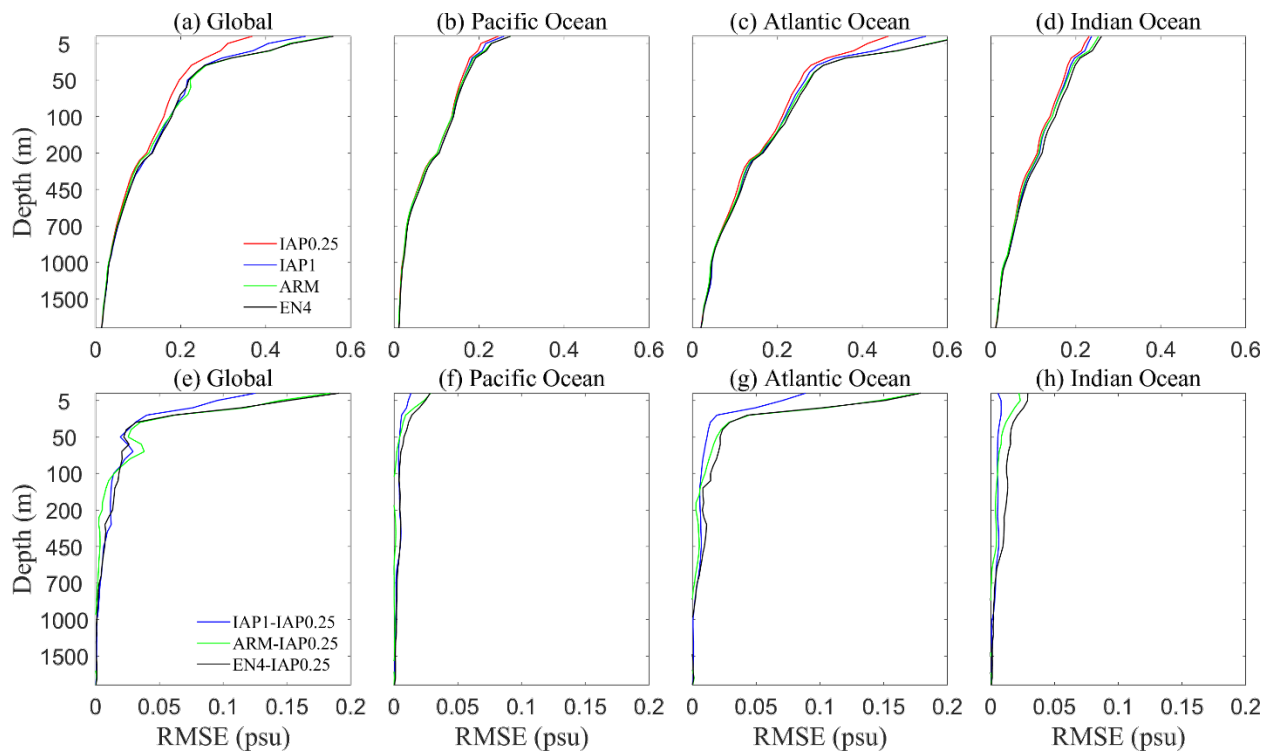

**Figure X5: (a–d) Vertical distribution of RMSE for IAP1°, ARMOR3D, EN4, and IAP0.25° for the globe and three major basin regions during 1993–2018. (e–h) Vertical distribution of RMSE for IAP1°, ARMOR3D, and EN4 minus IAP0.25°, respectively.**

- (395) take off parenthesis. why did you include lower quality data?

Re: We decided to remove “~~with lower data quality~~”.

- (397) I would say even something about lowest reduction

Re: One sentence added “The lowest RMSE reduction is seen in the Indian Ocean, likely associated with smaller area of the western boundary current systems and relatively less meso-scale activities compared with the other two basins.”

- Figure 11. The y-axis limits should be the same for all subfigures for a more informative graphical comparison of results. In the caption I would mention that time series are averaged over the different areas

Re: Great suggestion, we have revised the figure as suggested.

- (404) \*reveals, instead of suggests, more precise

Re: Done

- (406) \*with the other products considered

Re: Done

4. Five-fold cross validation and uncertainty estimate

- (412) I would recall these independent observations, referring also to subsec 2.2.

Re: Thanks a lot. Here, independent observations refer to test data, not independent data in subsec 2.2.

- (421) typo: \* are obviously not biased

[Re: Done](#)

- (424-435) it is confusing how you comment the findings. First you talk about Figure 12e, then 12a-12d and then 12e again. Revise the whole paragraph, possibly shortening Figure 12. in the caption the sentence on correlation coefficient should be found when talking about panels a-d

[Re: This paragraph has been revised to](#) “Besides, we calculated the RMSE and its degradation between the reconstructed salinity fields and in situ observations of the training and testing sets at each depth layer (Fig. 12). The degradation rate is defined as: (RMSE of the testing set - RMSE of the training set) / (RMSE of the training set), to quantify the generalization of the model. Fig. 12(a) shows that RMSE of the testing set is consistent (only marginally higher than) with that of the training set. The degradation rate decreases rapidly with depth, about 5.49% at the surface and 0.10% at 100 m. Specifically, at 10 m, the RMSE is 0.261 psu for the training set and 0.269 psu for the testing set, the degradation rate is 3% (Fig. 12b, c); and at 100 m, the RMSE is decreases from 0.1403 psu (training set) to 0.1401 psu (testing set) (Fig. 12d, e). Besides, the correlation coefficient is slightly lower for the testing set: for example, 0.686 at 10 m but 0.707 for training set at the same depth; at 100 m, it decreases from 0.625 (training) to 0.623 (testing). As the testing set is independent from training set, this test indicates that the FFNN model does not experience serious overfitting, and the method is valid.”

[Caption revised to](#) “Figure 12: (a) Vertical distribution of RMSE for the training set and testing set for global region (bottom x-axis) and the RMSE degradation from the training set to the testing set (top x-axis). (b–e) Density distribution diagrams at depths of 10 m and 100 m for the training set and testing set, as well as RMSE and correlation coefficients ( $r$ ) for the corresponding layers. ~~The correlation coefficient is denoted by “ $r$ ”, and~~ The color-coded blocks represent the density of samples.”

## 5. Evaluation of the major climatic patterns

- (454) saying a "very significant linear trend" is too vague. Have you computed it with a p-value? what is the annual rate of change? state better

[Re: We have removed “very significant”, instead, give the linear trend with 90% CI to indicate the uncertainty \(the error bar is calculated taking account of the reduction of degree of freedom\). Sentence revised to](#) “The global-scale SC2000 increases significantly from 1993 to 2018, with a ~~very significant~~ linear trend of  $0.045 \pm 0.0058$  psu century<sup>-1</sup> (at 90% confidence level, the reduction of degree of freedom has been accounted for in this calculation).”

- Figure 13. the title should be Salinity Contrast index at Surface/0-2000m. I believe no y label is needed, and anyways should not be salinity since SC is shown

[Re: Thanks, we have revised the figure as suggested.](#)



- (461) \*for both the salinity at surface and averaged over the 0-2000m volume

Re: Sentence revised to “Besides the global-scale SC metric, we also present the salinity-time series over the globe and in different ocean basins for IAP1° and IAP0.25° from 1993 to 2018 for both the salinity anomalies at the surface (S0) ~~SSS~~ and averaged over the 1–2000 m volume (S2000) ~~0–2000 m averaged salinity (S2000)~~, in Figs. 14 and 15.”.

- (475) To me the sentence regarding increased SC is not clear

Re: This sentence was not correct. Revised to “The contrast salinity change between Pacific Ocean (decreasing, Fig. 15b) and Atlantic Ocean (increasing, Fig. 15c) is associated with increased inter-basin transport of water vapor from the Atlantic to the Pacific (Reagan et al., 2018; Curry et al., 2003)”.

- (479) you are talking about anomalies, why should average values impact the change? state better

Re: Thanks, the sentence has been modified to “S2000 increases in the North Indian Ocean (Fig. 15e) but decreases in the South Indian Ocean (Fig. 15f), showing a “salty gets saltier, fresh gets fresher” change, mainly because of the amplified global hydrological cycle.”.

- (486) typo: \*systematic twice

Re: Done.

- Figure 14 & 15. if possible all subfigures should have same y axis limits to ease comparison. Are these salinity anomalies?

Re: Accordingly, we have tried to set the Y-axis of the panels to the same limit, but the curves in the graph look too flat and many variabilities are less visible (Fig.X6), so we still keep the original y limits. Nevertheless, we made some improvements to the graph, such as changing the titles to S0 and S2000.

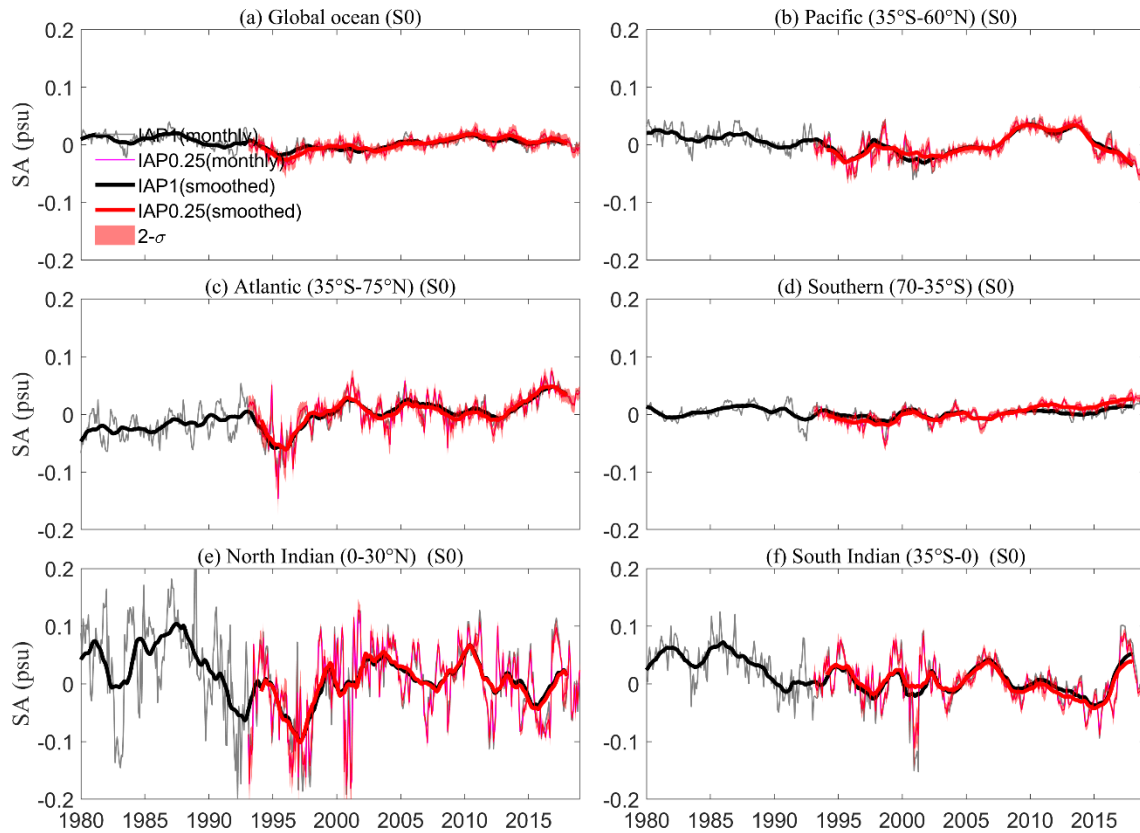

**Figure X6: The global (a) and basinal (b-f) salinity anomalies (SA) time series at surface from 1993 to 2018 for IAP1° and IAP0.25° respectively. Both monthly and 12-month running smoothed time series are presented, all data are relative to a 1993–2015 baseline.**

## 6. Data availability

- (494) take off \*mainly

[Re: Done](#)

- (498) \*at a monthly resolution

[Re: Done](#)

## 7. Summary and Discussion

- (502) \*were given as inputs to the FFNN algorithm for reconstruction

[Re: Done](#)

- (508) it is vague to say that IAP025 performs best compared with many available gridded products. state better

[Re: Revised to](#) “(1) IAP0.25° salinity data maintain the large-scale information from IAP1° gridded data. Because previous evaluations suggest that IAP1° provides more physically tenable large-scale patterns and long-term climate change and variabilities compared to many available datasets, thus the reliability of large-scale signals also becomes an advantage of the new IAP0.25° product.”.

- (510) you should mention that for point (2) you are referring to subsurface salinity field. Indeed I don't see why separating this point from previous one. Instead, I would say something of your findings of rmse or climatic patterns, which are not cited in this summary

- I suggest that this section should be revised trying to make it more appealing, and pointing more clearly to your findings.

Re: Thanks a lot. In view of the above three suggestions, summary revised to “(1) IAP0.25° salinity data maintain the large-scale information from IAP1° gridded data. Because previous evaluations suggest that IAP1° provides more physically tenable large-scale patterns and long-term climate change and variabilities compared to many available datasets, thus the reliability of large-scale signals also becomes an advantage of the new IAP0.25° product. (2) Compared with IAP1°, the RMSE of IAP0.25° can be reduced by ~11% on a global average. Besides, IAP0.25° shows more realistic spatial signals in the Gulf Stream, Kuroshio, and Antarctic Circumpolar Current regions with strong mesoscale variations than the IAP1° product, indicating that FFNN can effectively transfer small-scale spatial variations in ADT, SST and SSW fields into the  $0.25^\circ \times 0.25^\circ$  salinity field. It thus serves as an improvement on the currently available IAP data. (3) We show that the FFNN approach is effective in merging different kinds of Earth observations, and the method is robust and can be reliably used for ocean state reconstruction, thus can complement the existing data assimilation and objective analysis methods.”.
